# Supplementary material
Source: publisher site journal article supplement (https://www.dovepress.com/article/267283)
Supplement: Supplementary file 1 [file get_supplementary_file.php]

**Supplementary Table 1 – Economic evaluation of the healthcare items of expenditure**

| **Preparation phase** | **Human resources (on the basis of timing)** | **Medical devices [open or closed system used in the preparation phase]** | | **Traceable Workflow** | | **Consumables and equipment [Personal protective equipment and clothing, solution and reagents for disinfection, protective chemotherapy bag]** | | **Other cost, related to the process [amortisation costs related to equipment]** | | **Fixed Costs [15% of the healthcare direct costs] and disposal activities** | | **Total** |
| --- | --- | --- | --- | --- | --- | --- | --- | --- | --- | --- | --- | --- |
| Scenario 0 | € 5.72 | € 6.26 | | € 0.00 | | € 7.81 | | € 1.47 | | € 3.39 | | **€ 24.64** |
| Scenario 1 | € 4.22 | € 10.30 | | € 0.00 | | € 5.29 | | € 1.47 | | € 3.39 | | **€ 24.67** |
| Scenario 2 | € 4.22 | € 10.30 | | € 0.00 | | € 5.29 | | € 1.47 | | € 3.39 | | **€ 24.67** |
| Scenario 3 | € 2.77 | € 10.30 | | € 1.77 | | € 5.29 | | € 1.47 | | € 3.44 | | **€ 25.04** |
|  | | | | | | | | | | | | |
| **Administration phase** | **Human resources (on the basis of timing)** | | **Medical devices**  **[open or closed system used in the administration phase]** | | **Traceable Workflow** | | **Consumables and equipment [Personal protective equipment and clothing]** | | **Fixed Costs**  **[15% of the healthcare direct costs]** | | **Total** | |
| Scenario 0 | € 1.63 | | € 6.95 | | € 0.00 | | € 1.48 | | € 1.51 | | **€ 11.57** | |
| Scenario 1 | € 1.63 | | € 6.95 | | € 0.00 | | € 1.48 | | € 1.51 | | **€ 11.57** | |
| Scenario 2 | € 0.98 | | € 6.66 | | € 0.00 | | € 1.45 | | € 1.36 | | **€ 10.45** | |
| Scenario 3 | € 0.98 | | € 6.66 | | € 1.77 | | € 1.45 | | € 1.63 | | **€ 12.48** | |
